# Supplementary material
Source: Research Square preprint supplement (doi:10.21203/rs.3.rs-9542943/v1)
Supplement: Supplementary file 1 [file 08bd2ef0371f9c209b327e88.pdf]

**Table 1: Demographic, clinical and laboratory characteristics and neuroimaging findings of excluded and included participants:**

|                                                       | All (n= 1661)                       | Excluded (n=1091)                   | Included (n=570)                    | p-value |
|-------------------------------------------------------|-------------------------------------|-------------------------------------|-------------------------------------|---------|
| Gender (%)                                            |                                     |                                     |                                     |         |
| Male                                                  | 777/1585 (49.0)                     | 486/1016 (47.8)                     | 291/569 (51.1)                      | 0.36    |
| Female                                                | 808/1585 (51.0)                     | 530/1016 (52.2)                     | 278/569 (48.9)                      |         |
| Symptomatic at birth (%)                              | 811/1661 (48.8)                     | 451/1091 (41.3)                     | 360/570 (63.2)                      | <0.001  |
| Abnormal physical exam at birth                       | 361/1540 (23.4)                     | 193/981 (19.7)                      | 168/559 (30.1)                      | <0.001  |
| Splenomegaly                                          | 62/1540 (4.0)                       | 27/981 (2.8)                        | 35/559 (6.3)                        | 0.004   |
| Petechiae                                             | 125/1540 (8.1)                      | 52/981 (5.6)                        | 73/559 (13.1)                       | <0.001  |
| Hypotonia                                             | 52/1540 (3.4)                       | 28/981 (2.9)                        | 24/559 (4.3)                        | 0.32    |
| Normal cranial MRI                                    | 444/972 (45.7)                      | 169/402 (42.0)                      | 275/570 (48.2)                      | 0.06    |
| cUS findings                                          |                                     |                                     |                                     |         |
| cUS WMA:                                              |                                     |                                     |                                     |         |
| - Focal/multifocal                                    | 68/1412 (4.8)                       | 35/842 (4.2)                        | 33/570 (5.8)                        | 0.38    |
| - Diffuse                                             | 30/1412 (2.1)                       | 15/842 (1.8)                        | 15/570 (2.6)                        | 0.54    |
| cUS Lenticulostriate vasculopathy                     | 245/1412 (17.3)                     | 116/842 (13.8)                      | 129/570 (22.6)                      | <0.001  |
| cUS Intracranial calcifications:                      |                                     |                                     |                                     |         |
| - Single                                              | 53/1412 (3.8)                       | 17/842 (2.0)                        | 36/570 (6.3)                        | <0.001  |
| - Multiple                                            | 59/1412 (4.2)                       | 24/842 (2.8)                        | 35/570 (6.1)                        | 0.002   |
| - Extensive                                           | 3/1412 (0.2)                        | 1/842 (0.1)                         | 2/570 (0.4)                         | 0.67    |
| cUS Ventriculomegaly                                  |                                     |                                     |                                     |         |
| - Mild-moderate >97 <sup>th</sup> centile             | 79/1412 (5.6)                       | 35/842 (4.2)                        | 44/570 (7.7)                        | 0.03    |
| - Severe >97th centile + 4 mm                         | 3/1412 (0.2)                        | 1/842 (0.1)                         | 2/570 (0.4)                         | 0.67    |
| cUS Cerebellar hypoplasia                             | 3/1412 (0.2)                        | 1/842 (0.1)                         | 2/570 (0.4)                         | 0.67    |
| cUS Enlargement of the cisterna magna                 | 8/1412 (0.6)                        | 2/842 (0.2)                         | 6/570 (1.1)                         | 0.26    |
| cUS Microcephaly                                      | 22/1412 (1.6)                       | 11/842 (1.3)                        | 11/570 (1.9)                        | 0.14    |
| cUS Periventricular cysts                             | 110/1412 (7.8)                      | 48/842 (5.7)                        | 62/570 (10.9)                       | <0.001  |
| cUS Lissencephaly / other migrational abnormalities   | 5/1412 (0.4)                        | 1/842 (0.1)                         | 4/570 (0.7)                         | 0.47    |
| cUS Polymicrogyria                                    | 7/1412 (0.5)                        | 3/842 (0.4)                         | 4/570 (0.7)                         | 0.61    |
| cUS Caudothalamic / subependymal cysts / germinolysis | 141/1412 (10.0)                     | 53/842 (6.3)                        | 88/570 (15.4)                       | <0.001  |
| HL at birth                                           | 438/1419 (30.9)                     | 285/866 (32.9)                      | 153/553 (27.7)                      | 0.73    |
| Choriorretinitis at birth                             | 16/1455 (1.1)                       | 9/908 (1.0)                         | 7/547 (1.3)                         | 0.58    |
| Platelets (cs/mm <sup>3</sup> ) (median, IQR)         | 226000.00<br>[141000.00, 293000.00] | 226000.00<br>[144500.00, 294500.00] | 225000.00<br>[130250.00, 287750.00] | 0.352   |

## Annex 2: Illustration of how to calculate the risk of sequelae in a specific patient according to the cCMVnet score

### Example 1:

Child with cCMV infection, gestational age 35 weeks and 2 days.

At birth he presented with normal anthropometry and physical examination. Cranial ultrasound (cUS) showed isolated lenticulostriate vasculopathy and cranial MRI did not describe any abnormal finding. Automated auditory brainstem response (AABR) described normal hearing.

cCMVnet score value (table 3) = 0 (none findings selected in multiple logistic regression) = 0 points.

Estimated probability of sequelae according to 0 points (figure 3) = 12.5% (IC 95 %: 6.7–22.2)

|                         |                                     |                           |
|-------------------------|-------------------------------------|---------------------------|
| Clinical findings       | none                                | 0                         |
| Neuroimaging            | Lenticulostriate vasculopathy (cUS) | 0                         |
| AABR                    | Normal hearing                      | 0                         |
| cCMVnet score value     |                                     | 0                         |
| Probability of sequelae |                                     | 12.5% (IC 95 %: 6.7–22.2) |

### Example 2:

Child with cCMV infection, gestational age 38 weeks and 5 days.

At birth he presented with normal anthropometry and physical examination. Cranial ultrasound (cUS) showed caudothalamic cysts and in the cranial MRI there is no other findings. Automated auditory brainstem response (A-ABR) described normal hearing.

cCMVnet score value (table 3) = 1.383 (OR caudothalamic cysts) = 1.383 points.

Estimated probability of sequelae according to 1.383 points (figure 3) = 14.5% (IC 95 %: 8.2–24.4)

|                         |                           |                           |
|-------------------------|---------------------------|---------------------------|
| Clinical findings       | none                      | 0                         |
| Neuroimaging            | Caudothalamic cysts (cUS) | 1.383                     |
| AABR                    | Normal hearing            | 0                         |
| cCMVnet score value     |                           | 1.383                     |
| Probability of sequelae |                           | 14.5% (IC 95 %: 8.2–24.4) |

### Example 3:

Child with cCMV infection, gestational age 37 weeks and 0 days.

At birth he presented with - 1.9 Z-score newborn weight and microcephaly (Z-Score - 2.3) at physical examination and severe hypotonia. Cranial ultrasound and cranial MRI showed ventriculomegaly and microcephaly. Automated auditory brainstem response (A-ABR) described mild and unilateral hearing loss.

cCMVnet score value (table 3) = 2.070 (OR microcephaly) + 3.225 (OR hypotonia) + 3.520 (OR MRI ventriculomegaly) + 13.872 (OR mild hearing loss) = 22.687 points.

Estimated probability of sequelae according to 22.687 points (figure 3) = 59.7% (IC 95 %: 33.9–81.1)

|                         |                              |                            |
|-------------------------|------------------------------|----------------------------|
| Clinical findings       | Microcephaly                 | 2.070                      |
|                         | Hypotonia                    | 3.225                      |
| Neuroimaging            | Ventriculomegaly (MRI)       | 3.520                      |
| AABR                    | Mild unilateral hearing loss | 13.872                     |
| cCMVnet score value     |                              | 22.687                     |
| Probability of sequelae |                              | 59.7% (IC 95 %: 33.9–81.1) |
